# Supplementary material for: Genome Data Provides High Support for Generic Boundaries in Burkholderia Sensu Lato
Source: Front Microbiol. 2017 Jun 26;8:1154. doi: 10.3389/fmicb.2017.01154 (PMC5483467; doi:10.3389/fmicb.2017.01154)
Supplement: Supplementary file 4 [file Data_Sheet_1.XLSX]

## Sheet: Full_concatenated_similarity_ma
Supplementary file S1 a) Pair-wise protein sequence similarity values inferred from the alignment of the concatenated dataset of 106 protein-coding genes for the taxa included in this study.
		P_caledonica	P_bryophila	P_kirstenboschensis	P_dilworthii	P_phenoliruptrix	P_graminis	P_terricola	P_ginsengisoli	P_monticola	P_tuberum	P_sprentiae	P_ginsengiterrae	P_xenovorans	P_phytofirmans	P_aspalathi	P_fungorum	P_phenazinium	P_sartisoli	P_diazotrophica	P_phymatum	P_caribensis	P_terrae	P_hospita	P_kururiensis	P_caballeronis	P_acidipaludis'	P_ferrariae	P_heleia	P_nodosa	P_mimosarum	P_oxyphila	P_sacchari	P_tropica	P_bannensis	C_humi	C_terrestris	C_choica	C_telluris	C_arationis'	C_glathei	C_sordidicola	C_udeis	C_consitans'	C_grimmiae	C_zhejiangensis	C_fortuita'	C_temeraria'	C_cordobensis
Paraburkholderia	P_caledonica		99.7	98.9	98.8	98.4	98.6	96.9	97.6	96.5	96.4	96.2	97.3	97.4	97.5	97.3	97.4	95.6	95	94.2	94.4	94.4	94.3	94.1	92.6	93	92.4	92.3	92.5	92.4	92.5	92.4	92.3	92.3	92.2	91.8	91.8	91.9	92	91.4	92	91.2	91.3	91.2	91.8	91.7	91.5	91.6	91.5
	P_bryophila	99.7		98.9	98.8	98.4	98.6	96.9	97.6	96.5	96.4	96.3	97.3	97.3	97.5	97.3	97.4	95.6	94.9	94.2	94.4	94.4	94.3	94.2	92.6	93	92.4	92.3	92.5	92.4	92.5	92.4	92.3	92.3	92.2	91.8	91.8	91.9	92	91.4	92	91.2	91.3	91.2	91.8	91.7	91.5	91.6	91.5
	P_kirstenboschensis	98.9	98.9		98.4	97.9	98.1	96.5	97.2	96.1	96	95.8	96.8	96.9	97.1	96.9	96.9	95.2	94.5	93.7	93.9	93.9	93.8	93.7	92.2	92.5	91.9	91.8	92	91.9	92	91.9	91.9	91.8	91.7	91.3	91.3	91.4	91.5	90.9	91.6	90.8	90.8	90.7	91.3	91.2	91.1	91.1	91
	P_dilworthii	98.8	98.8	98.4		98.3	98.5	96.9	97.5	96.5	96.4	96.3	97.3	97.4	97.5	97.2	97.4	95.6	94.9	94.1	94.2	94.3	94.2	94.1	92.5	92.8	92.3	92.2	92.4	92.2	92.3	92.3	92.2	92.1	92	91.8	91.7	91.8	91.9	91.3	92	91.2	91.2	91.1	91.7	91.6	91.4	91.5	91.4
	P_phenoliruptrix	98.4	98.4	97.9	98.3		98.6	96.7	97.3	96.5	96.3	96.2	97.2	97.2	97.3	97	97.2	95.6	94.7	94.3	94.4	94.4	94.4	94.2	92.6	93	92.4	92.3	92.5	92.3	92.4	92.4	92.4	92.2	92.2	91.8	91.7	91.8	91.9	91.3	92.1	91.1	91.1	91.2	91.8	91.8	91.7	91.7	91.6
	P_graminis	98.6	98.6	98.1	98.5	98.6		96.9	97.5	96.5	96.4	96.3	97.3	97.4	97.5	97.3	97.4	95.6	94.9	94.4	94.4	94.5	94.4	94.2	92.6	92.9	92.4	92.4	92.6	92.4	92.5	92.4	92.4	92.3	92.2	91.9	91.8	91.9	92	91.4	92.1	91.2	91.3	91.2	91.9	91.8	91.7	91.7	91.6
	P_terricola	96.9	96.9	96.5	96.9	96.7	96.9		96.9	95.7	95.6	95.5	96.6	96.9	97	96.9	96.8	95.2	94.3	93.5	93.5	93.7	93.6	93.5	91.8	92.1	91.5	91.4	91.7	91.6	91.7	91.6	91.6	91.5	91.4	91.1	91.1	91.1	91.2	90.6	91.3	90.5	90.5	90.4	91	90.9	90.8	90.8	90.7
	P_ginsengisoli	97.6	97.6	97.2	97.5	97.3	97.5	96.9		97	96.8	96.7	97.5	98	97.9	97.8	97.8	95.8	95.1	94	94.1	94.3	94.3	94.2	92.4	92.8	92.2	92.1	92.4	92.2	92.4	92.2	92.2	92.1	92.2	91.9	91.8	91.9	91.9	91.4	92	91.3	91.2	91.2	91.8	91.7	91.5	91.6	91.5
	P_monticola	96.5	96.5	96.1	96.5	96.5	96.5	95.7	97		98.5	98.3	96.4	96.6	96.6	96.3	96.3	95.1	94.3	93.8	94	94	94	93.8	92.2	92.6	92.1	92	92.4	92.2	92.3	92.2	92.1	92	92.1	91.6	91.5	91.6	91.6	91.1	91.8	90.8	90.8	91	91.6	91.5	91.4	91.4	91.3
	P_tuberum	96.4	96.4	96	96.4	96.3	96.4	95.6	96.8	98.5		98.5	96.2	96.4	96.4	96.2	96.2	95	94.2	93.8	93.9	93.9	93.9	93.7	92.1	92.6	92	92	92.2	92.1	92.2	92.1	92	91.9	92	91.4	91.3	91.4	91.5	90.9	91.7	90.7	90.7	91	91.5	91.4	91.3	91.3	91.3
	P_sprentiae	96.2	96.3	95.8	96.3	96.2	96.3	95.5	96.7	98.3	98.5		96.1	96.3	96.3	96.1	96.1	94.9	94.1	93.7	93.8	93.7	93.8	93.6	92	92.5	91.9	91.9	92.1	92	92.1	92	91.9	91.9	91.9	91.4	91.3	91.4	91.4	90.9	91.6	90.7	90.7	90.9	91.4	91.4	91.2	91.3	91.2
	P_ginsengiterrae	97.3	97.3	96.8	97.3	97.2	97.3	96.6	97.5	96.4	96.2	96.1		97.6	97.9	97.7	97.6	95.9	94.9	94.1	94.3	94.4	94.4	94.3	92.4	92.7	92.3	92.1	92.4	92.2	92.3	92.3	92.2	92.2	92.1	91.7	91.7	91.8	91.8	91.2	92	91.1	91.1	91	91.6	91.6	91.4	91.5	91.5
	P_xenovorans	97.4	97.3	96.9	97.4	97.2	97.4	96.9	98	96.6	96.4	96.3	97.6		98.3	97.7	97.7	95.8	94.9	93.9	94.1	94.2	94.2	94	92.4	92.7	92.2	92.1	92.4	92.3	92.3	92.2	92.1	92.1	92.1	91.8	91.7	91.8	91.8	91.2	91.9	91.3	91.3	91.1	91.6	91.6	91.4	91.5	91.5
	P_phytofirmans	97.5	97.5	97.1	97.5	97.3	97.5	97	97.9	96.6	96.4	96.3	97.9	98.3		98.1	98	96	95	94.1	94.2	94.3	94.3	94.2	92.4	92.7	92.2	92.1	92.3	92.3	92.4	92.3	92.2	92.1	92.1	91.9	91.8	91.9	91.9	91.3	92	91.2	91.3	91.1	91.7	91.6	91.4	91.5	91.5
	P_aspalathi	97.3	97.3	96.9	97.2	97	97.3	96.9	97.8	96.3	96.2	96.1	97.7	97.7	98.1		98.6	96.1	95.2	94.1	94.3	94.4	94.4	94.3	92.3	92.8	92.3	92.2	92.4	92.3	92.3	92.2	92.2	92.1	92.1	91.8	91.8	92	92	91.3	92	91.2	91.3	91.1	91.7	91.6	91.4	91.5	91.5
	P_fungorum	97.4	97.4	96.9	97.4	97.2	97.4	96.8	97.8	96.3	96.2	96.1	97.6	97.7	98	98.6		96.1	95.1	94.1	94.2	94.3	94.3	94.2	92.4	92.8	92.3	92.2	92.4	92.3	92.4	92.3	92.2	92.1	92.1	91.8	91.8	92	91.9	91.2	92	91.3	91.3	91.1	91.6	91.6	91.4	91.5	91.4
	P_phenazinium	95.6	95.6	95.2	95.6	95.6	95.6	95.2	95.8	95.1	95	94.9	95.9	95.8	96	96.1	96.1		94.9	94.1	94.2	94.3	94.3	94.1	92.5	92.8	92.4	92.3	92.3	92.2	92.3	92.4	92.2	92.2	92.2	91.9	91.8	91.9	91.9	91.3	92.1	91.2	91.2	91.1	91.7	91.6	91.5	91.5	91.5
	P_sartisoli	95	94.9	94.5	94.9	94.7	94.9	94.3	95.1	94.3	94.2	94.1	94.9	94.9	95	95.2	95.1	94.9		93.8	94	94.1	94.2	94	92.2	92.6	92.1	92	92	91.9	92.1	92	91.9	91.8	91.8	91.6	91.5	91.7	91.7	91	91.9	90.9	90.9	90.9	91.5	91.5	91.3	91.4	91.3
	P_diazotrophica	94.2	94.2	93.7	94.1	94.3	94.4	93.5	94	93.8	93.8	93.7	94.1	93.9	94.1	94.1	94.1	94.1	93.8		97.2	97.1	96.9	96.7	92.7	92.9	92.5	92.4	92.5	92.5	92.5	92.5	92.4	92.3	92.2	91.6	91.6	91.8	91.8	91.2	92	90.7	90.6	91.2	91.7	92	91.8	91.8	91.7
	P_phymatum	94.4	94.4	93.9	94.2	94.4	94.4	93.5	94.1	94	93.9	93.8	94.3	94.1	94.2	94.3	94.2	94.2	94	97.2		97.8	97.6	97.4	92.7	92.8	92.5	92.6	92.6	92.5	92.5	92.5	92.4	92.4	92.3	91.7	91.6	91.7	91.7	91.2	91.9	90.7	90.7	91.2	91.8	91.9	91.8	91.9	91.8
	P_caribensis	94.4	94.4	93.9	94.3	94.4	94.5	93.7	94.3	94	93.9	93.7	94.4	94.2	94.3	94.4	94.3	94.3	94.1	97.1	97.8		99.1	98.8	92.6	92.9	92.4	92.4	92.6	92.5	92.5	92.4	92.4	92.3	92.2	91.8	91.8	91.8	91.9	91.4	92.1	90.7	90.8	91.3	91.8	91.9	91.8	91.9	91.8
	P_terrae	94.3	94.3	93.8	94.2	94.4	94.4	93.6	94.3	94	93.9	93.8	94.4	94.2	94.3	94.4	94.3	94.3	94.2	96.9	97.6	99.1		99.4	92.6	92.8	92.4	92.3	92.5	92.5	92.5	92.4	92.3	92.3	92.2	91.8	91.8	91.8	91.9	91.4	92.1	90.8	90.9	91.2	91.8	91.9	91.7	91.9	91.7
	P_hospita	94.1	94.2	93.7	94.1	94.2	94.2	93.5	94.2	93.8	93.7	93.6	94.3	94	94.2	94.3	94.2	94.1	94	96.7	97.4	98.8	99.4		92.5	92.7	92.2	92.2	92.3	92.3	92.3	92.2	92.1	92.1	92	91.7	91.7	91.7	91.8	91.3	91.9	90.7	90.8	91	91.6	91.7	91.5	91.7	91.6
	P_kururiensis	92.6	92.6	92.2	92.5	92.6	92.6	91.8	92.4	92.2	92.1	92	92.4	92.4	92.4	92.3	92.4	92.5	92.2	92.7	92.7	92.6	92.6	92.5		93.2	92.3	92.2	92.3	92	92.2	92.1	92	91.7	91.6	90.6	90.5	90.6	90.7	90.2	91	89.6	89.7	90.1	90.6	90.7	90.6	90.7	90.5
	P_caballeronis	93	93	92.5	92.8	93	92.9	92.1	92.8	92.6	92.6	92.5	92.7	92.7	92.7	92.8	92.8	92.8	92.6	92.9	92.8	92.9	92.8	92.7	93.2		94.3	94.5	94.4	94.3	94.4	94.1	94.1	93.9	93.7	90.7	90.6	90.9	90.8	90.2	91.1	90	90	90.3	90.8	91	90.9	90.9	90.8
	P_acidipaludis'	92.4	92.4	91.9	92.3	92.4	92.4	91.5	92.2	92.1	92	91.9	92.3	92.2	92.2	92.3	92.3	92.4	92.1	92.5	92.5	92.4	92.4	92.2	92.3	94.3		96.9	96	95.9	96	96	95.7	95.5	95.5	90.3	90.3	90.3	90.4	89.8	90.5	89.6	89.6	90	90.6	90.8	90.7	90.7	90.6
	P_ferrariae	92.3	92.3	91.8	92.2	92.3	92.4	91.4	92.1	92	92	91.9	92.1	92.1	92.1	92.2	92.2	92.3	92	92.4	92.6	92.4	92.3	92.2	92.2	94.5	96.9		95.9	95.8	95.9	95.9	95.7	95.6	95.4	90.3	90.2	90.4	90.3	89.8	90.5	89.4	89.4	89.9	90.4	90.7	90.5	90.6	90.5
	P_heleia	92.5	92.5	92	92.4	92.5	92.6	91.7	92.4	92.4	92.2	92.1	92.4	92.4	92.3	92.4	92.4	92.3	92	92.5	92.6	92.6	92.5	92.3	92.3	94.4	96	95.9		98.7	98.1	96.7	96.5	96.5	96.4	90.2	90.2	90.3	90.4	89.8	90.5	89.5	89.5	90.1	90.6	90.9	90.7	90.8	90.6
	P_nodosa	92.4	92.4	91.9	92.2	92.3	92.4	91.6	92.2	92.2	92.1	92	92.2	92.3	92.3	92.3	92.3	92.2	91.9	92.5	92.5	92.5	92.5	92.3	92	94.3	95.9	95.8	98.7		98	96.6	96.4	96.5	96.4	90.3	90.2	90.3	90.3	89.7	90.5	89.5	89.4	89.9	90.4	90.8	90.7	90.7	90.5
	P_mimosarum	92.5	92.5	92	92.3	92.4	92.5	91.7	92.4	92.3	92.2	92.1	92.3	92.3	92.4	92.3	92.4	92.3	92.1	92.5	92.5	92.5	92.5	92.3	92.2	94.4	96	95.9	98.1	98		96.7	96.5	96.3	96.3	90.3	90.3	90.4	90.4	89.8	90.6	89.5	89.4	89.9	90.4	90.8	90.7	90.7	90.6
	P_oxyphila	92.4	92.4	91.9	92.3	92.4	92.4	91.6	92.2	92.2	92.1	92	92.3	92.2	92.3	92.2	92.3	92.4	92	92.5	92.5	92.4	92.4	92.2	92.1	94.1	96	95.9	96.7	96.6	96.7		97.7	96.6	96.6	90.4	90.3	90.4	90.5	89.9	90.5	89.6	89.6	90.1	90.5	90.9	90.8	90.8	90.7
	P_sacchari	92.3	92.3	91.9	92.2	92.4	92.4	91.6	92.2	92.1	92	91.9	92.2	92.1	92.2	92.2	92.2	92.2	91.9	92.4	92.4	92.4	92.3	92.1	92	94.1	95.7	95.7	96.5	96.4	96.5	97.7		96.4	96.4	90.3	90.2	90.3	90.4	89.7	90.4	89.5	89.4	90	90.4	90.8	90.6	90.7	90.6
	P_tropica	92.3	92.3	91.8	92.1	92.2	92.3	91.5	92.1	92	91.9	91.9	92.2	92.1	92.1	92.1	92.1	92.2	91.8	92.3	92.4	92.3	92.3	92.1	91.7	93.9	95.5	95.6	96.5	96.5	96.3	96.6	96.4		97.1	90.1	90.1	90.1	90.2	89.6	90.3	89.3	89.3	89.9	90.4	90.7	90.5	90.6	90.4
	P_bannensis	92.2	92.2	91.7	92	92.2	92.2	91.4	92.2	92.1	92	91.9	92.1	92.1	92.1	92.1	92.1	92.2	91.8	92.2	92.3	92.2	92.2	92	91.6	93.7	95.5	95.4	96.4	96.4	96.3	96.6	96.4	97.1		90	90	90.1	90.2	89.6	90.2	89.4	89.3	89.7	90.2	90.6	90.4	90.5	90.2
Caballeronia	C_humi	91.8	91.8	91.3	91.8	91.8	91.9	91.1	91.9	91.6	91.4	91.4	91.7	91.8	91.9	91.8	91.8	91.9	91.6	91.6	91.7	91.8	91.8	91.7	90.6	90.7	90.3	90.3	90.2	90.3	90.3	90.4	90.3	90.1	90		99.3	97.3	96.9	96.2	96.5	93.7	94	93.7	94.3	94.2	94.2	94.2	94.2
	C_terrestris	91.8	91.8	91.3	91.7	91.7	91.8	91.1	91.8	91.5	91.3	91.3	91.7	91.7	91.8	91.8	91.8	91.8	91.5	91.6	91.6	91.8	91.8	91.7	90.5	90.6	90.3	90.2	90.2	90.2	90.3	90.3	90.2	90.1	90	99.3		97.3	96.9	96.2	96.5	93.7	93.9	93.7	94.3	94.2	94.1	94.1	94.1
	C_choica	91.9	91.9	91.4	91.8	91.8	91.9	91.1	91.9	91.6	91.4	91.4	91.8	91.8	91.9	92	92	91.9	91.7	91.8	91.7	91.8	91.8	91.7	90.6	90.9	90.3	90.4	90.3	90.3	90.4	90.4	90.3	90.1	90.1	97.3	97.3		97	96.4	96.6	93.7	93.9	93.7	94.3	94.3	94.2	94.2	94.1
	C_telluris	92	92	91.5	91.9	91.9	92	91.2	91.9	91.6	91.5	91.4	91.8	91.8	91.9	92	91.9	91.9	91.7	91.8	91.7	91.9	91.9	91.8	90.7	90.8	90.4	90.3	90.4	90.3	90.4	90.5	90.4	90.2	90.2	96.9	96.9	97		97.8	96.3	93.5	93.7	93.7	94.4	94.3	94.3	94.2	94.2
	C_arationis'	91.4	91.4	90.9	91.3	91.3	91.4	90.6	91.4	91.1	90.9	90.9	91.2	91.2	91.3	91.3	91.2	91.3	91	91.2	91.2	91.4	91.4	91.3	90.2	90.2	89.8	89.8	89.8	89.7	89.8	89.9	89.7	89.6	89.6	96.2	96.2	96.4	97.8		95.7	92.9	93	94.5	93.8	93.7	93.7	93.6	93.6
	C_glathei	92	92	91.6	92	92.1	92.1	91.3	92	91.8	91.7	91.6	92	91.9	92	92	92	92.1	91.9	92	91.9	92.1	92.1	91.9	91	91.1	90.5	90.5	90.5	90.5	90.6	90.5	90.4	90.3	90.2	96.5	96.5	96.6	96.3	95.7		93.5	93.7	93.8	94.4	94.4	94.3	94.3	94.3
	C_sordidicola	91.2	91.2	90.8	91.2	91.1	91.2	90.5	91.3	90.8	90.7	90.7	91.1	91.3	91.2	91.2	91.3	91.2	90.9	90.7	90.7	90.7	90.8	90.7	89.6	90	89.6	89.4	89.5	89.5	89.5	89.6	89.5	89.3	89.4	93.7	93.7	93.7	93.5	92.9	93.5		97.2	92	92.4	92.4	92.3	92.3	92.2
	C_udeis	91.3	91.3	90.8	91.2	91.1	91.3	90.5	91.2	90.8	90.7	90.7	91.1	91.3	91.3	91.3	91.3	91.2	90.9	90.6	90.7	90.8	90.9	90.8	89.7	90	89.6	89.4	89.5	89.4	89.4	89.6	89.4	89.3	89.3	94	93.9	93.9	93.7	93	93.7	97.2		91.8	92.3	92.4	92.2	92.3	92.3
	C_concitans'	91.2	91.2	90.7	91.1	91.2	91.2	90.4	91.2	91	91	90.9	91	91.1	91.1	91.1	91.1	91.1	90.9	91.2	91.2	91.3	91.2	91	90.1	90.3	90	89.9	90.1	89.9	89.9	90.1	90	89.9	89.7	93.7	93.7	93.7	93.7	94.5	93.8	92	91.8		97.2	95.7	95.7	95.6	95.5
	C_grimmiae	91.8	91.8	91.3	91.7	91.8	91.9	91	91.8	91.6	91.5	91.4	91.6	91.6	91.7	91.7	91.6	91.7	91.5	91.7	91.8	91.8	91.8	91.6	90.6	90.8	90.6	90.4	90.6	90.4	90.4	90.5	90.4	90.4	90.2	94.3	94.3	94.3	94.4	93.8	94.4	92.4	92.3	97.2		96	96	95.9	95.9
	C_zhejiangensis	91.7	91.7	91.2	91.6	91.8	91.8	90.9	91.7	91.5	91.4	91.4	91.6	91.6	91.6	91.6	91.6	91.6	91.5	92	91.9	91.9	91.9	91.7	90.7	91	90.8	90.7	90.9	90.8	90.8	90.9	90.8	90.7	90.6	94.2	94.2	94.3	94.3	93.7	94.4	92.4	92.4	95.7	96		98.7	98.7	97.8
	C_fortuita'	91.5	91.5	91.1	91.4	91.7	91.7	90.8	91.5	91.4	91.3	91.2	91.4	91.4	91.4	91.4	91.4	91.5	91.3	91.8	91.8	91.8	91.7	91.5	90.6	90.9	90.7	90.5	90.7	90.7	90.7	90.8	90.6	90.5	90.4	94.2	94.1	94.2	94.3	93.7	94.3	92.3	92.2	95.7	96	98.7		98.4	97.7
	C_temeraria'	91.6	91.6	91.1	91.5	91.7	91.7	90.8	91.6	91.4	91.3	91.3	91.5	91.5	91.5	91.5	91.5	91.5	91.4	91.8	91.9	91.9	91.9	91.7	90.7	90.9	90.7	90.6	90.8	90.7	90.7	90.8	90.7	90.6	90.5	94.2	94.1	94.2	94.2	93.6	94.3	92.3	92.3	95.6	95.9	98.7	98.4		97.8
	C_cordobensis	91.5	91.5	91	91.4	91.6	91.6	90.7	91.5	91.3	91.3	91.2	91.5	91.5	91.5	91.5	91.4	91.5	91.3	91.7	91.8	91.8	91.7	91.6	90.5	90.8	90.6	90.5	90.6	90.5	90.6	90.7	90.6	90.4	90.2	94.2	94.1	94.1	94.2	93.6	94.3	92.2	92.3	95.5	95.9	97.8	97.7	97.8
	C_hypogeia'	91.6	91.5	91	91.5	91.6	91.6	90.8	91.6	91.4	91.3	91.2	91.5	91.5	91.4	91.5	91.5	91.5	91.3	91.8	91.7	91.8	91.7	91.6	90.6	90.8	90.7	90.5	90.8	90.7	90.6	90.8	90.7	90.6	90.5	94.1	94	94.1	94.2	93.5	94.2	92.2	92.3	95.4	95.9	97.8	97.7	97.8	97.6
	C_calidae'	91.5	91.5	91.1	91.5	91.7	91.7	90.8	91.6	91.4	91.4	91.2	91.5	91.5	91.5	91.5	91.5	91.5	91.4	91.9	91.9	91.9	91.8	91.6	90.7	90.9	90.7	90.5	90.7	90.6	90.6	90.8	90.6	90.6	90.5	94.2	94.2	94.3	94.3	93.7	94.4	92.3	92.3	95.6	96	98.1	97.8	98	97.9
	C_megalochromosomata	91.6	91.6	91.1	91.5	91.7	91.7	90.8	91.6	91.4	91.3	91.2	91.5	91.5	91.5	91.5	91.5	91.6	91.4	91.8	91.7	91.7	91.7	91.5	90.5	90.9	90.6	90.5	90.7	90.7	90.6	90.7	90.7	90.5	90.4	94.4	94.3	94.3	94.4	93.8	94.5	92.4	92.4	95.5	95.9	98.1	97.9	98.1	97.6
	C_jiangsuensis	91.6	91.6	91.1	91.4	91.6	91.7	90.7	91.5	91.3	91.2	91.2	91.4	91.5	91.5	91.4	91.4	91.5	91.4	91.7	91.8	91.8	91.7	91.6	90.5	90.9	90.6	90.5	90.7	90.6	90.6	90.7	90.6	90.5	90.4	94.3	94.2	94.3	94.4	93.7	94.4	92.3	92.3	95.5	95.9	98.1	97.8	98.1	97.6
	C_pedi'	91	91	90.5	90.9	91	91.1	90.2	90.9	90.8	90.7	90.6	90.9	90.9	90.9	90.9	90.9	90.9	90.8	91.1	91	91.2	91.1	91	89.9	90.2	89.9	89.8	90	89.9	89.9	90	89.9	89.9	89.7	93.7	93.6	93.7	93.7	94.4	93.7	91.8	91.8	96.2	95.2	97.1	97	97.2	96.8
	C_turbans'	91	91	90.5	90.9	91.1	91.1	90.2	91	90.8	90.7	90.7	90.9	90.9	90.9	90.8	90.9	90.9	90.8	91.3	91.3	91.2	91.1	91	90	90.3	90	89.9	90.1	90	90	90.1	90	89.9	89.7	93.7	93.6	93.7	93.7	94.4	93.8	91.8	91.8	96.4	95.4	97.5	97.3	97.5	96.9
	C_peredens'	90.8	90.8	90.3	90.8	91	91	90.1	90.8	90.6	90.6	90.5	90.8	90.8	90.8	90.8	90.8	90.8	90.7	91	90.9	91.1	91	90.9	89.9	90.2	89.9	89.8	90	89.9	89.9	90	89.9	89.7	89.6	93.4	93.3	93.5	93.6	94.3	93.6	91.7	91.7	96.1	95.2	96.4	96.2	96.5	96.4
	C_ptereochthonis'	91.1	91.1	90.6	91.1	91.2	91.3	90.4	91.1	91	90.9	90.8	91.1	91.1	91.1	91	91.1	91	90.8	91.4	91.3	91.4	91.3	91.1	90.2	90.4	90.2	90	90.2	90.1	90.2	90.2	90.1	90	89.8	93.7	93.6	93.8	93.8	94.6	93.9	91.8	91.8	96.3	95.4	96.7	96.6	96.6	96.5
	C_glebae'	90.7	90.7	90.2	90.6	90.7	90.8	89.9	90.7	90.5	90.4	90.3	90.6	90.6	90.6	90.6	90.5	90.6	90.6	90.8	90.8	90.9	90.9	90.8	89.7	90	89.8	89.6	89.8	89.8	89.7	89.9	89.7	89.7	89.5	93.3	93.2	93.3	93.3	94.1	93.3	91.6	91.6	95.7	94.9	97.1	96.9	97.1	96.6
	C_arvi'	90.9	90.8	90.4	90.8	90.9	91	90.1	90.9	90.7	90.6	90.6	90.8	90.9	90.8	90.8	90.8	90.8	90.7	91.2	91.1	91.1	91.1	91	89.9	90.1	90	89.9	90	90	90	90.1	90	89.9	89.7	93.5	93.4	93.5	93.5	94.2	93.7	91.7	91.7	96.1	95.2	97	96.9	97	97.8
	C_catudaia'	90.7	90.7	90.2	90.6	90.7	90.8	90	90.7	90.5	90.4	90.4	90.6	90.7	90.7	90.6	90.6	90.6	90.5	91	90.9	91	90.9	90.8	89.8	90	89.8	89.7	89.9	89.8	89.8	89.9	89.9	89.7	89.5	93.4	93.3	93.4	93.3	94	93.6	91.6	91.6	96	95.1	96.8	96.6	96.8	97.5
Burkholderia	B_plantarii	90.5	90.5	90	90.4	90.6	90.5	89.7	90.5	90.5	90.3	90.2	90.3	90.4	90.4	90.4	90.5	90.2	90	90.4	90.4	90.5	90.4	90.3	89.8	90.3	90	90	90.1	89.9	90	90	89.9	89.8	90	89	89	89.1	89.1	88.6	89.4	88.5	88.4	88.8	89.3	89.4	89.3	89.4	89.3
	B_glumae	90.6	90.5	90.1	90.4	90.6	90.5	89.8	90.5	90.5	90.3	90.3	90.3	90.4	90.3	90.4	90.5	90.2	89.9	90.4	90.5	90.4	90.3	90.2	89.9	90.3	90.1	90.1	90.1	89.9	90.1	90.1	90	89.9	90	89	89	89.1	89	88.5	89.3	88.5	88.4	88.7	89.2	89.4	89.2	89.3	89.3
	B_gladioli	90.5	90.5	90	90.4	90.5	90.5	89.8	90.6	90.5	90.4	90.4	90.3	90.4	90.4	90.4	90.5	90.3	90	90.4	90.5	90.4	90.4	90.3	89.8	90.2	90.2	90.1	90.2	90	90.1	90	90.1	89.9	90.2	89.1	89.1	89.2	89.2	88.7	89.4	88.6	88.5	88.7	89.2	89.5	89.3	89.4	89.2
	B_mallei	91.2	91.2	90.6	91.1	91.3	91.2	90.4	91.2	91.1	91	91	91	91	91	91	91.1	91	90.7	91.4	91.3	91.2	91.1	91	91	91.1	90.8	90.8	90.8	90.5	90.7	90.7	90.7	90.5	90.5	89.8	89.7	89.9	89.9	89.4	90.1	89.1	89	89.5	90	90.2	90	90.1	89.9
	B_pseudomallei	91.2	91.2	90.7	91.2	91.4	91.3	90.4	91.2	91.2	91.1	91	91	91.1	91.1	91.1	91.2	91	90.8	91.4	91.3	91.2	91.2	91	91	91.1	90.9	90.8	90.8	90.5	90.7	90.8	90.7	90.5	90.5	89.8	89.8	90	90	89.5	90.2	89.1	89	89.5	90	90.2	90	90.1	90
	B_thailandensis	91.4	91.3	90.8	91.3	91.4	91.4	90.6	91.4	91.3	91.2	91.1	91.2	91.2	91.2	91.2	91.3	91.2	90.9	91.5	91.5	91.3	91.2	91.1	91.2	91.3	91	90.9	91	90.6	90.8	90.9	90.8	90.6	90.6	89.9	89.9	90.1	90.1	89.6	90.3	89.2	89.1	89.6	90.1	90.3	90.1	90.2	90.1
	B_oklahomensis	91.2	91.2	90.7	91.1	91.3	91.3	90.5	91.3	91.1	91	90.9	91.2	91.2	91.1	91.2	91.3	91	91	91.4	91.3	91.3	91.2	91.1	90.9	91.1	90.8	90.6	90.8	90.5	90.7	90.7	90.6	90.5	90.4	89.9	89.9	90.1	90	89.5	90.2	89.2	89.2	89.5	90.1	90.2	90	90.2	90.1
	B_stagnalis	91.4	91.4	90.9	91.3	91.5	91.4	90.6	91.5	91.5	91.4	91.3	91.3	91.4	91.3	91.4	91.4	91.3	91.1	91.5	91.6	91.5	91.4	91.3	90.9	91.2	90.9	90.9	91	90.8	90.8	90.9	90.9	90.7	90.7	90.1	90	90	90.1	89.6	90.3	89.3	89.2	89.6	90.1	90.4	90.2	90.3	90.2
	B_ubonensis	91.2	91.2	90.7	91.2	91.3	91.3	90.5	91.3	91.3	91.2	91.1	91.1	91.2	91.1	91.2	91.3	91.2	90.9	91.4	91.4	91.3	91.2	91.1	90.8	91	90.8	90.8	90.9	90.6	90.7	90.7	90.7	90.6	90.6	89.9	89.9	89.9	89.9	89.4	90.2	89.1	89	89.5	90	90.2	90.1	90.2	90.1
	B_dolosa	91.5	91.5	91	91.4	91.6	91.5	90.7	91.5	91.5	91.4	91.4	91.3	91.3	91.2	91.4	91.4	91.2	91	91.7	91.7	91.6	91.5	91.4	91.1	91.3	91.1	91	91.1	90.9	91	91	91	90.9	90.8	90.2	90.2	90.2	90.3	89.8	90.5	89.4	89.3	89.7	90.3	90.5	90.3	90.4	90.3
	B_multivorans	91.6	91.6	91	91.5	91.6	91.6	90.8	91.6	91.7	91.5	91.5	91.5	91.4	91.3	91.5	91.5	91.3	91.1	91.7	91.8	91.7	91.6	91.4	91.1	91.3	91	91	91.2	90.9	91.1	91.1	91.1	90.9	90.9	90.1	90.1	90.2	90.3	89.8	90.5	89.3	89.3	89.8	90.4	90.6	90.4	90.4	90.4
	B_pseudomultivorans	91.6	91.6	91.1	91.5	91.6	91.6	90.8	91.6	91.6	91.4	91.4	91.5	91.4	91.3	91.5	91.5	91.3	91	91.6	91.6	91.6	91.5	91.4	90.9	91.3	91	91	91.1	90.9	91	91.1	91	90.9	90.8	90	90	90.1	90.1	89.7	90.3	89.3	89.3	89.7	90.2	90.4	90.2	90.3	90.2
	B_territorii	91.5	91.5	91	91.4	91.6	91.5	90.8	91.5	91.5	91.3	91.3	91.3	91.4	91.3	91.4	91.5	91.2	91	91.6	91.5	91.5	91.5	91.4	91	91.2	91	90.8	91	90.8	90.9	90.9	90.9	90.8	90.8	90.1	90.1	90.1	90.1	89.7	90.3	89.4	89.3	89.7	90.2	90.5	90.3	90.4	90.2
	B_diffusa	91.5	91.5	91	91.4	91.6	91.5	90.8	91.5	91.5	91.3	91.3	91.3	91.4	91.3	91.4	91.5	91.1	91	91.5	91.5	91.5	91.4	91.3	91	91.2	90.9	90.8	91	90.8	90.9	90.9	90.8	90.7	90.7	90.1	90.1	90.1	90.1	89.7	90.3	89.4	89.3	89.6	90.1	90.5	90.3	90.3	90.2
	B_latens	91.6	91.5	91	91.4	91.6	91.5	90.7	91.5	91.5	91.4	91.3	91.3	91.3	91.3	91.4	91.5	91.1	91	91.6	91.6	91.5	91.5	91.3	90.9	91.2	90.9	90.8	91	90.7	90.9	90.8	90.8	90.7	90.6	90.1	90.1	90.1	90.1	89.7	90.4	89.3	89.2	89.7	90.2	90.4	90.3	90.3	90.2
	B_vietnamiensis	91.4	91.4	90.9	91.3	91.4	91.4	90.6	91.3	91.3	91.2	91.1	91.2	91.3	91.1	91.3	91.3	91	90.9	91.4	91.4	91.4	91.3	91.2	90.9	91.1	90.8	90.7	90.9	90.7	90.8	90.8	90.8	90.6	90.6	90	90	90	90	89.6	90.2	89.1	89.2	89.5	90	90.3	90.1	90.2	90.1
	B_ambifaria	91.3	91.3	90.8	91.2	91.3	91.3	90.5	91.3	91.3	91.1	91.1	91.1	91.1	91.1	91.2	91.2	90.9	90.8	91.2	91.3	91.3	91.3	91.1	90.8	91	90.7	90.6	90.8	90.5	90.7	90.7	90.6	90.5	90.5	90	89.9	90	90	89.6	90.2	89.2	89.1	89.4	89.9	90.2	90	90.1	90
	B_pyrrocinia	91.4	91.4	90.9	91.3	91.4	91.4	90.6	91.4	91.3	91.2	91.2	91.2	91.3	91.2	91.4	91.4	91.1	90.9	91.3	91.3	91.4	91.4	91.3	90.9	91.1	90.8	90.7	90.9	90.7	90.7	90.8	90.8	90.7	90.6	90	89.9	90	89.9	89.6	90.2	89.2	89.2	89.5	90	90.2	90.1	90.2	90
	B_stabilis	90.4	90.4	90.1	90.3	90.4	90.4	89.6	90.4	90.4	90.3	90.2	90.3	90.3	90.2	90.4	90.4	90.1	90	90.3	90.4	90.4	90.4	90.4	90.1	90.1	89.8	89.7	89.9	89.8	89.8	89.8	89.8	89.7	89.7	89	89	89	89	88.7	89.2	88.2	88.2	88.5	89	89.3	89.1	89.2	89.1
	B_cenocepacia	91.4	91.4	90.9	91.3	91.5	91.4	90.7	91.5	91.4	91.3	91.3	91.3	91.3	91.2	91.5	91.4	91.1	91	91.4	91.4	91.4	91.4	91.2	90.9	91.2	90.9	90.8	91	90.8	90.9	90.9	90.9	90.8	90.7	90	90	90	90.1	89.6	90.2	89.3	89.2	89.6	90	90.3	90.2	90.2	90.1
	B_anthina	91.5	91.4	90.9	91.4	91.5	91.5	90.7	91.5	91.5	91.3	91.3	91.3	91.3	91.3	91.4	91.4	91.1	91	91.5	91.5	91.5	91.4	91.3	91	91.2	90.9	90.7	91	90.7	90.9	90.9	90.8	90.7	90.7	90	90	90.1	90.1	89.6	90.3	89.3	89.2	89.6	90.1	90.3	90.2	90.3	90.1
	B_seminalis	91.4	91.4	90.9	91.3	91.5	91.4	90.6	91.4	91.4	91.3	91.2	91.3	91.3	91.3	91.4	91.4	91.1	91	91.4	91.4	91.4	91.4	91.3	90.8	91.1	90.9	90.8	90.9	90.7	90.8	90.8	90.9	90.7	90.7	89.9	89.9	90	90	89.6	90.3	89.2	89.2	89.6	90	90.3	90.1	90.3	90.1
	B_cepacia	91.4	91.4	90.9	91.3	91.4	91.4	90.6	91.4	91.4	91.2	91.2	91.3	91.3	91.3	91.4	91.4	91.2	91	91.3	91.4	91.4	91.4	91.2	90.8	91.1	90.8	90.7	90.9	90.7	90.8	90.9	90.9	90.7	90.7	90	89.9	90	90	89.6	90.2	89.2	89.2	89.5	90	90.3	90.1	90.2	90.1
	B_contaminans	91.3	91.3	90.8	91.1	91.3	91.2	90.5	91.3	91.2	91.1	91.1	91.2	91.1	91.1	91.3	91.3	91	90.8	91.2	91.2	91.2	91.2	91	90.7	91	90.7	90.6	90.8	90.6	90.7	90.7	90.8	90.6	90.7	89.7	89.7	89.7	89.8	89.3	90	89.1	89	89.2	89.7	90.1	89.9	89.9	89.8
	B_lata	91.4	91.4	90.9	91.2	91.3	91.4	90.6	91.4	91.3	91.2	91.1	91.2	91.3	91.2	91.4	91.3	91.1	90.9	91.2	91.3	91.3	91.3	91.1	90.7	91	90.8	90.7	90.8	90.7	90.7	90.8	90.8	90.7	90.7	89.9	89.8	89.9	89.9	89.5	90.1	89.2	89.1	89.4	89.9	90.2	90	90.1	90
	P_rhizoxinica	88.1	88.1	87.5	88	88.1	88.1	87.3	88	87.8	87.8	87.8	87.8	87.9	87.8	87.8	88.1	87.9	87.8	88.2	88	88.1	87.9	87.8	87.9	88	87.6	87.6	87.7	87.5	87.8	87.7	87.6	87.3	87.3	87.3	87.2	87.4	87.4	86.9	87.6	86.7	86.8	86.9	87.4	87.5	87.4	87.4	87.3
	Ro_andropogonis	82	82	81.5	81.9	82	82	81.3	82	82	81.9	81.9	81.9	82	81.9	81.9	81.9	81.9	81.8	82	82	82	81.9	81.8	81.2	82	81.8	81.8	81.9	81.7	81.9	81.8	81.8	81.7	81.7	81.5	81.5	81.6	81.5	81.1	81.6	81.4	81.3	81.2	81.7	81.5	81.5	81.4	81.5
	Cu_nantongensis	81.6	81.7	81.2	81.5	81.6	81.6	80.9	81.6	81.6	81.5	81.3	81.5	81.6	81.5	81.5	81.6	81.3	81.3	81.5	81.5	81.5	81.4	81.3	81.1	81.4	81.3	81.4	81.3	81.2	81.3	81.4	81.4	81.1	81.1	81	81	81	81	80.6	81.1	80.6	80.5	80.8	81.1	81.1	81.2	81.1	81.1
	Cu_necator	81.8	81.8	81.3	81.6	81.7	81.7	81	81.7	81.6	81.5	81.4	81.6	81.7	81.6	81.6	81.6	81.5	81.5	81.7	81.7	81.6	81.6	81.5	81.2	81.5	81.4	81.5	81.4	81.3	81.4	81.5	81.5	81.2	81.3	81.2	81.2	81.2	81.2	80.8	81.3	80.7	80.7	80.8	81.2	81.2	81.2	81.2	81.2
	Cu_metallidurans	81.5	81.6	81.1	81.4	81.5	81.5	80.8	81.5	81.4	81.3	81.2	81.4	81.4	81.4	81.4	81.5	81.3	81.4	81.5	81.4	81.5	81.4	81.3	81	81.5	81.3	81.4	81.3	81.3	81.4	81.5	81.3	81.2	81.2	80.9	80.9	81	81	80.6	81	80.6	80.5	80.6	81.1	81.2	81.1	81.2	81.1
	Ra_solanacearum	81.4	81.4	81	81.3	81.4	81.4	80.6	81.4	81.3	81.2	81.2	81.3	81.3	81.3	81.3	81.3	81.1	81.1	81.4	81.4	81.4	81.3	81.2	81.1	81.2	81.1	81.2	81.2	81	81.2	81.1	81.1	80.9	80.9	80.8	80.8	80.8	80.8	80.5	80.8	80.3	80.4	80.5	80.8	80.9	80.8	80.9	80.9
	Ra_pickettii	81.4	81.4	80.9	81.3	81.3	81.4	80.6	81.4	81.2	81.2	81.1	81.3	81.2	81.3	81.3	81.3	81	81	81.3	81.3	81.3	81.3	81.2	80.9	81.1	81.1	81.1	81.1	81	81.2	81.1	81.1	80.9	80.9	80.7	80.7	80.8	80.8	80.4	80.7	80.3	80.3	80.5	80.8	80.9	80.8	80.8	80.9
	Ra_mannitolytica	81.6	81.6	81.2	81.5	81.6	81.6	80.9	81.6	81.5	81.4	81.3	81.5	81.5	81.5	81.5	81.5	81.3	81.3	81.7	81.6	81.7	81.6	81.4	81.4	81.4	81.4	81.4	81.4	81.3	81.5	81.4	81.4	81.2	81.1	81	81	81.1	81	80.7	81.1	80.5	80.6	80.8	81.2	81.2	81.2	81.2	81.2
Supplementary file S1 b) Pair-wise nucleotide sequence similarity values inferred from the alignment of the concatenated dataset of 106 protein-coding genes for the taxa included in this study.
Paraburkholderia		P_caledonica	P_bryophila	P_kirstenboschensis	P_dilworthii	P_phenoliruptrix	P_graminis	P_terricola	P_ginsengisoli	P_monticola	P_tuberum	P_sprentiae	P_ginsengiterrae	P_xenovorans	P_phytofirmans	P_aspalathi	P_fungorum	P_phenazinium	P_sartisoli	P_diazotrophica	P_phymatum	P_caribensis	P_terrae	P_hospita	P_kururiensis	P_caballeronis	P_acidipaludis'	P_ferrariae	P_heleia	P_nodosa	P_mimosarum	P_oxyphila	P_sacchari	P_tropica	P_bannensis	C_humi	C_terrestris	C_choica	C_telluris	C_arationis'	C_glathei	C_sordidicola	C_udeis	C_consitans'	C_grimmiae	C_zhejiangensis	C_fortuita'	C_temeraria'	C_cordobensis
	P_caledonica		98.1	96.3	94.2	92.8	93.5	91.1	92.1	90.8	90.3	90.3	91.8	91.9	91.9	91.5	91.2	89.5	89	88.3	87.9	88.3	88.3	88.2	86	87.3	86.4	86.6	86.6	86.6	86.4	86.5	86.3	86.7	86.4	85.8	85.9	86.1	86.2	86	86.1	84.1	84.1	85.7	85.7	85.6	85.5	85.8	85.7
	P_bryophila	98.1		96.4	94.3	92.9	93.7	91.2	92.2	90.9	90.4	90.4	91.9	92	92	91.6	91.3	89.5	89.1	88.3	88	88.4	88.4	88.3	86.1	87.4	86.5	86.6	86.7	86.7	86.5	86.5	86.4	86.8	86.5	85.9	85.9	86.1	86.3	86.1	86.1	84.1	84.2	85.8	85.7	85.8	85.6	85.9	85.8
	P_kirstenboschensis	96.3	96.4		94.3	92.7	93.5	91	92	90.7	90.2	90.2	91.7	91.9	91.8	91.4	91.1	89.3	88.8	88	87.6	88	88.1	88	85.8	87.1	86.2	86.4	86.4	86.4	86.3	86.3	86.2	86.4	86.3	85.6	85.7	85.8	85.9	85.6	85.9	83.7	83.9	85.5	85.5	85.5	85.4	85.6	85.4
	P_dilworthi	94.2	94.3	94.3		93	93.8	91.4	92.3	91	90.5	90.5	92.1	92.2	92.2	91.7	91.5	89.5	89.1	88.4	88	88.3	88.4	88.4	86.1	87.3	86.4	86.6	86.6	86.7	86.5	86.5	86.3	86.7	86.4	86	86	86.2	86.3	86	86.2	84.1	84.3	85.9	85.8	85.8	85.8	85.9	85.7
	P_phenoliruptrix	92.8	92.9	92.7	93		94.2	91.2	92	91.1	90.6	90.7	91.9	91.8	91.9	91.4	91.3	89.7	89.4	88.8	88.3	88.6	88.7	88.6	86.7	87.8	87.1	87.3	87.3	87.3	87.2	87.2	87	87.3	87	86.4	86.4	86.5	86.8	86.5	86.7	84.4	84.5	86.3	86.1	86.2	86.2	86.4	86.2
	P_graminis	93.5	93.7	93.5	93.8	94.2		91.8	92.7	91.6	91.1	91.1	92.5	92.6	92.6	92.1	91.8	90.1	89.8	89.1	88.7	89.1	89.1	89	86.8	88.1	87.3	87.4	87.4	87.5	87.3	87.3	87.1	87.4	87.2	86.8	86.8	86.9	87.1	86.8	87	84.6	84.7	86.7	86.6	86.7	86.6	86.8	86.6
	P_terricola	91.1	91.2	91	91.4	91.2	91.8		92.4	90.9	90.5	90.5	92.1	92.4	92.4	92.2	91.9	89.7	89.2	88.2	87.7	88.1	88.2	88.1	85.9	87.3	86.3	86.5	86.5	86.5	86.4	86.3	86.2	86.7	86.5	85.7	85.8	86.1	86.1	85.9	86.1	83.8	84	85.6	85.6	85.6	85.5	85.8	85.6
	P_ginsengisoli	92.1	92.2	92	92.3	92	92.7	92.4		92.6	92.1	92.1	93.3	93.7	93.7	93.2	92.8	90.6	90	89.1	88.7	89.1	89.2	89.2	86.6	88.2	87.1	87.3	87.3	87.4	87.2	87.2	86.9	87.6	87.3	86.6	86.7	86.9	87.1	86.8	86.9	84.6	84.8	86.5	86.5	86.5	86.4	86.8	86.5
	P_monticola	90.8	90.9	90.7	91	91.1	91.6	90.9	92.6		95.5	95.2	91.8	91.9	91.7	91.3	91.1	89.8	89.7	89.3	88.8	89.1	89.2	89.2	87	88.8	87.6	87.8	87.7	87.7	87.6	87.6	87.4	87.8	87.6	86.7	86.8	87	87.1	86.9	87.1	84.3	84.5	86.6	86.6	86.7	86.7	86.9	86.6
	P_tuberum	90.3	90.4	90.2	90.5	90.6	91.1	90.5	92.1	95.5		95.4	91.2	91.3	91.1	90.7	90.6	89.2	89.1	88.9	88.3	88.5	88.6	88.6	86.5	88.3	87.1	87.2	87.2	87.3	87.1	87.2	87	87.3	87.1	86.2	86.3	86.5	86.7	86.5	86.6	83.9	84	86.1	86.2	86.2	86.2	86.4	86.2
	P_sprentiae	90.3	90.4	90.2	90.5	90.7	91.1	90.5	92.1	95.2	95.4		91.1	91.4	91.2	90.8	90.5	89.3	89.2	88.9	88.3	88.6	88.7	88.6	86.5	88.4	87.1	87.3	87.4	87.4	87.2	87.2	87	87.3	87.2	86.3	86.4	86.6	86.7	86.5	86.8	84	84.1	86.2	86.2	86.2	86.2	86.5	86.2
	P_ginsengiterrae	91.8	91.9	91.7	92.1	91.9	92.5	92.1	93.3	91.8	91.2	91.1		93.8	93.9	93.1	92.9	90.5	89.7	88.9	88.4	89	89.1	89	86.6	87.8	87.1	87.3	87.2	87.3	87.1	87.1	87	87.3	87.2	86.3	86.3	86.6	86.7	86.5	86.7	84.4	84.6	86.1	86.1	86.2	86.1	86.4	86.2
	P_xenovorans	91.9	92	91.9	92.2	91.8	92.6	92.4	93.7	91.9	91.3	91.4	93.8		94.8	93.2	92.9	90.4	89.8	88.7	88.4	88.8	88.8	88.8	86.6	87.8	87	87.1	87.1	87.2	87.1	87	86.8	87.3	87.1	86.4	86.4	86.7	86.7	86.5	86.6	84.5	84.8	86.2	86.1	86.2	86.1	86.4	86.2
	P_phytofirmans	91.9	92	91.8	92.2	91.9	92.6	92.4	93.7	91.7	91.1	91.2	93.9	94.8		93.4	93	90.6	89.7	88.7	88.4	88.8	88.9	88.9	86.5	87.6	86.9	87	87	87.1	87	86.9	86.8	87.3	87	86.4	86.4	86.6	86.7	86.5	86.5	84.5	84.7	86.1	86	86.2	86	86.4	86.2
	P_aspalathi	91.5	91.6	91.4	91.7	91.4	92.1	92.2	93.2	91.3	90.7	90.8	93.1	93.2	93.4		95	90.7	89.7	88.6	88.3	88.7	88.9	88.8	86.1	87.5	86.6	86.8	86.8	86.9	86.6	86.6	86.5	87	86.9	86.2	86.2	86.4	86.5	86.3	86.3	84.3	84.6	85.9	85.8	85.9	85.8	86	85.9
	P_fungorum	91.2	91.3	91.1	91.5	91.3	91.8	91.9	92.8	91.1	90.6	90.5	92.9	92.9	93	95		90.5	89.5	88.5	88	88.5	88.6	88.6	86.1	87.3	86.5	86.6	86.6	86.7	86.5	86.6	86.4	86.8	86.7	85.9	86	86.3	86.3	86.1	86.1	84.2	84.5	85.7	85.7	85.8	85.6	85.9	85.8
	P_phenazinium	89.5	89.5	89.3	89.5	89.7	90.1	89.7	90.6	89.8	89.2	89.3	90.5	90.4	90.6	90.7	90.5		89.7	88.7	88.2	88.7	88.8	88.7	86.6	87.6	87.2	87.3	87	87.2	87	87.1	86.9	87.2	87.2	86	86	86.4	86.4	86.2	86.4	84.1	84.4	85.8	85.7	85.7	85.6	85.9	85.9
	P_sartisoli	89	89.1	88.8	89.1	89.4	89.8	89.2	90	89.7	89.1	89.2	89.7	89.8	89.7	89.7	89.5	89.7		89.3	88.7	89.2	89.4	89.3	87	88.4	87.4	87.5	87.4	87.5	87.3	87.3	87.1	87.5	87.4	86.8	86.8	87	87.3	87	87.1	84.4	84.6	86.4	86.3	86.5	86.4	86.7	86.5
	P_diazotrophica	88.3	88.3	88	88.4	88.8	89.1	88.2	89.1	89.3	88.9	88.9	88.9	88.7	88.7	88.6	88.5	88.7	89.3		92.6	93	93	93	87.3	88.8	87.8	88	87.9	88	87.9	87.8	87.5	87.9	87.7	86.8	86.9	87.1	87.4	87.1	87.3	84	84.3	86.9	86.8	87	86.9	87.1	86.9
	P_phymatum	87.9	88	87.6	88	88.3	88.7	87.7	88.7	88.8	88.3	88.3	88.4	88.4	88.4	88.3	88	88.2	88.7	92.6		93.1	93.2	93.2	86.7	88	87.4	87.6	87.4	87.5	87.5	87.4	87.1	87.5	87.4	86.3	86.3	86.5	86.7	86.5	86.6	83.8	83.9	86.4	86.3	86.3	86.4	86.6	86.5
	P_caribensis	88.3	88.4	88	88.3	88.6	89.1	88.1	89.1	89.1	88.5	88.6	89	88.8	88.8	88.7	88.5	88.7	89.2	93	93.1		96.4	96.3	87	88.4	87.6	87.8	87.6	87.7	87.6	87.6	87.3	87.8	87.6	86.6	86.7	86.9	87	86.8	86.9	84.1	84.3	86.8	86.7	86.7	86.7	87	86.8
	P_terrae	88.3	88.4	88.1	88.4	88.7	89.1	88.2	89.2	89.2	88.6	88.7	89.1	88.8	88.9	88.9	88.6	88.8	89.4	93	93.2	96.4		97.5	86.9	88.4	87.6	87.7	87.6	87.7	87.6	87.6	87.3	87.8	87.6	86.7	86.7	86.9	87.1	86.9	87	84.1	84.3	86.8	86.7	86.7	86.7	87	86.8
	P_hospita	88.2	88.3	88	88.4	88.6	89	88.1	89.2	89.2	88.6	88.6	89	88.8	88.9	88.8	88.6	88.7	89.3	93	93.2	96.3	97.5		86.9	88.4	87.5	87.6	87.5	87.7	87.6	87.5	87.2	87.8	87.5	86.6	86.7	86.8	87.1	86.9	86.9	84.1	84.3	86.6	86.6	86.6	86.6	87	86.7
	P_kururiensis	86	86.1	85.8	86.1	86.7	86.8	85.9	86.6	87	86.5	86.5	86.6	86.6	86.5	86.1	86.1	86.6	87	87.3	86.7	87	86.9	86.9		88.2	87.6	87.7	87.5	87.4	87.5	87.4	87.2	87.2	86.9	85.2	85.3	85.4	85.8	85.5	85.9	82.7	82.9	85.4	85.2	85.2	85.2	85.4	85.3
	P_caballeronis	87.3	87.4	87.1	87.3	87.8	88.1	87.3	88.2	88.8	88.3	88.4	87.8	87.8	87.6	87.5	87.3	87.6	88.4	88.8	88	88.4	88.4	88.4	88.2		90	90.4	89.9	90	89.9	89.7	89.4	89.7	89.3	86.7	86.7	87.1	87.3	87	87.4	83.7	84	86.7	86.6	86.8	86.8	87	86.8
	P_acidipaludis'	86.4	86.5	86.2	86.4	87.1	87.3	86.3	87.1	87.6	87.1	87.1	87.1	87	86.9	86.6	86.5	87.2	87.4	87.8	87.4	87.6	87.6	87.5	87.6	90		93.8	91.9	92.1	92	92.1	91.7	91.6	91.2	85.7	85.7	86	86.3	86	86.3	83.1	83.4	86	85.8	86.1	86	86.2	86
	P_ferrariae	86.6	86.6	86.4	86.6	87.3	87.4	86.5	87.3	87.8	87.2	87.3	87.3	87.1	87	86.8	86.6	87.3	87.5	88	87.6	87.8	87.7	87.6	87.7	90.4	93.8		92.2	92.3	92.1	92.4	91.9	91.7	91.5	85.8	85.8	86.1	86.4	86.2	86.4	83.2	83.5	86	85.8	86.2	86.1	86.3	86.2
	P_heleia	86.6	86.7	86.4	86.6	87.3	87.4	86.5	87.3	87.7	87.2	87.4	87.2	87.1	87	86.8	86.6	87	87.4	87.9	87.4	87.6	87.6	87.5	87.5	89.9	91.9	92.2		96.9	94.6	92.9	92.4	92.3	92.1	85.7	85.7	85.8	86.2	86	86.2	83.2	83.4	86	85.7	86.1	85.9	86.1	86.1
	P_nodosa	86.6	86.7	86.4	86.7	87.3	87.5	86.5	87.4	87.7	87.3	87.4	87.3	87.2	87.1	86.9	86.7	87.2	87.5	88	87.5	87.7	87.7	87.7	87.4	90	92.1	92.3	96.9		94.9	93	92.6	92.5	92.3	85.7	85.8	85.9	86.3	86	86.2	83.2	83.5	86	85.8	86.1	85.9	86.2	86.1
	P_mimosarum	86.4	86.5	86.3	86.5	87.2	87.3	86.4	87.2	87.6	87.1	87.2	87.1	87.1	87	86.6	86.5	87	87.3	87.9	87.5	87.6	87.6	87.6	87.5	89.9	92	92.1	94.6	94.9		92.9	92.4	92.2	92	85.7	85.8	86	86.2	86	86.2	83.1	83.3	85.8	85.7	86.1	86	86.2	86.1
	P_oxyphila	86.5	86.5	86.3	86.5	87.2	87.3	86.3	87.2	87.6	87.2	87.2	87.1	87	86.9	86.6	86.6	87.1	87.3	87.8	87.4	87.6	87.6	87.5	87.4	89.7	92.1	92.4	92.9	93	92.9		94.7	92.8	92.6	85.7	85.8	86	86.3	86.1	86.2	83.1	83.5	85.9	85.7	86.1	85.9	86.1	86.2
	P_sacchari	86.3	86.4	86.2	86.3	87	87.1	86.2	86.9	87.4	87	87	87	86.8	86.8	86.5	86.4	86.9	87.1	87.5	87.1	87.3	87.3	87.2	87.2	89.4	91.7	91.9	92.4	92.6	92.4	94.7		92.4	92.3	85.5	85.5	85.7	85.9	85.8	85.9	82.8	83.3	85.7	85.5	85.9	85.7	85.9	85.9
	P_tropica	86.7	86.8	86.4	86.7	87.3	87.4	86.7	87.6	87.8	87.3	87.3	87.3	87.3	87.3	87	86.8	87.2	87.5	87.9	87.5	87.8	87.8	87.8	87.2	89.7	91.6	91.7	92.3	92.5	92.2	92.8	92.4		93.3	85.8	85.8	85.9	86.3	86.1	86.1	83.2	83.5	86.1	85.9	86.2	86.1	86.4	86.2
	P_bannensis	86.4	86.5	86.3	86.4	87	87.2	86.5	87.3	87.6	87.1	87.2	87.2	87.1	87	86.9	86.7	87.2	87.4	87.7	87.4	87.6	87.6	87.5	86.9	89.3	91.2	91.5	92.1	92.3	92	92.6	92.3	93.3		85.5	85.5	85.7	86	85.9	85.9	83.1	83.5	85.8	85.6	85.8	85.8	86.1	85.8
Caballeronia	C_humi	85.8	85.9	85.6	86	86.4	86.8	85.7	86.6	86.7	86.2	86.3	86.3	86.4	86.4	86.2	85.9	86	86.8	86.8	86.3	86.6	86.7	86.6	85.2	86.7	85.7	85.8	85.7	85.7	85.7	85.7	85.5	85.8	85.5		96.9	92.8	92.4	92.2	91.6	86.6	87	89.1	88.9	89	89	89.2	89
	C_terrestris	85.9	85.9	85.7	86	86.4	86.8	85.8	86.7	86.8	86.3	86.4	86.3	86.4	86.4	86.2	86	86	86.8	86.9	86.3	86.7	86.7	86.7	85.3	86.7	85.7	85.8	85.7	85.8	85.8	85.8	85.5	85.8	85.5	96.9		92.9	92.6	92.3	91.8	86.6	87	89.2	89	89.2	89.1	89.2	89
	C_choica	86.1	86.1	85.8	86.2	86.5	86.9	86.1	86.9	87	86.5	86.6	86.6	86.7	86.6	86.4	86.3	86.4	87	87.1	86.5	86.9	86.9	86.8	85.4	87.1	86	86.1	85.8	85.9	86	86	85.7	85.9	85.7	92.8	92.9		92.9	92.6	92.2	86.7	87.1	89.1	89	89.2	89.1	89.3	89.1
	C_telluris	86.2	86.3	85.9	86.3	86.8	87.1	86.1	87.1	87.1	86.7	86.7	86.7	86.7	86.7	86.5	86.3	86.4	87.3	87.4	86.7	87	87.1	87.1	85.8	87.3	86.3	86.4	86.2	86.3	86.2	86.3	85.9	86.3	86	92.4	92.6	92.9		95.7	92.1	86.7	87	89.5	89.4	89.5	89.6	89.8	89.6
	C_arationis'	86	86.1	85.6	86	86.5	86.8	85.9	86.8	86.9	86.5	86.5	86.5	86.5	86.5	86.3	86.1	86.2	87	87.1	86.5	86.8	86.9	86.9	85.5	87	86	86.2	86	86	86	86.1	85.8	86.1	85.9	92.2	92.3	92.6	95.7		91.8	86.3	86.7	89.6	89.1	89.3	89.3	89.5	89.3
	C_glathei	86.1	86.1	85.9	86.2	86.7	87	86.1	86.9	87.1	86.6	86.8	86.7	86.6	86.5	86.3	86.1	86.4	87.1	87.3	86.6	86.9	87	86.9	85.9	87.4	86.3	86.4	86.2	86.2	86.2	86.2	85.9	86.1	85.9	91.6	91.8	92.2	92.1	91.8		86.5	86.9	89.3	89.1	89.2	89.2	89.3	89.2
	C_sordidicola	84.1	84.1	83.7	84.1	84.4	84.6	83.8	84.6	84.3	83.9	84	84.4	84.5	84.5	84.3	84.2	84.1	84.4	84	83.8	84.1	84.1	84.1	82.7	83.7	83.1	83.2	83.2	83.2	83.1	83.1	82.8	83.2	83.1	86.6	86.6	86.7	86.7	86.3	86.5		90.4	85.5	85.5	85.3	85.3	85.4	85.4
	C_udeis	84.1	84.2	83.9	84.3	84.5	84.7	84	84.8	84.5	84	84.1	84.6	84.8	84.7	84.6	84.5	84.4	84.6	84.3	83.9	84.3	84.3	84.3	82.9	84	83.4	83.5	83.4	83.5	83.3	83.5	83.3	83.5	83.5	87	87	87.1	87	86.7	86.9	90.4		85.5	85.6	85.6	85.4	85.7	85.6
	C_concitans'	85.7	85.8	85.5	85.9	86.3	86.7	85.6	86.5	86.6	86.1	86.2	86.1	86.2	86.1	85.9	85.7	85.8	86.4	86.9	86.4	86.8	86.8	86.6	85.4	86.7	86	86	86	86	85.8	85.9	85.7	86.1	85.8	89.1	89.2	89.1	89.5	89.6	89.3	85.5	85.5		93.7	91.6	91.4	91.7	91.4
	C_grimmiae	85.7	85.7	85.5	85.8	86.1	86.6	85.6	86.5	86.6	86.2	86.2	86.1	86.1	86	85.8	85.7	85.7	86.3	86.8	86.3	86.7	86.7	86.6	85.2	86.6	85.8	85.8	85.7	85.8	85.7	85.7	85.5	85.9	85.6	88.9	89	89	89.4	89.1	89.1	85.5	85.6	93.7		91.1	91.2	91.4	91.1
	C_zhejiangensis	85.6	85.8	85.5	85.8	86.2	86.7	85.6	86.5	86.7	86.2	86.2	86.2	86.2	86.2	85.9	85.8	85.7	86.5	87	86.3	86.7	86.7	86.6	85.2	86.8	86.1	86.2	86.1	86.1	86.1	86.1	85.9	86.2	85.8	89	89.2	89.2	89.5	89.3	89.2	85.3	85.6	91.6	91.1		94.7	95.2	93.6
	C_fortuita'	85.5	85.6	85.4	85.8	86.2	86.6	85.5	86.4	86.7	86.2	86.2	86.1	86.1	86	85.8	85.6	85.6	86.4	86.9	86.4	86.7	86.7	86.6	85.2	86.8	86	86.1	85.9	85.9	86	85.9	85.7	86.1	85.8	89	89.1	89.1	89.6	89.3	89.2	85.3	85.4	91.4	91.2	94.7		94.7	93.4
	C_temeraria'	85.8	85.9	85.6	85.9	86.4	86.8	85.8	86.8	86.9	86.4	86.5	86.4	86.4	86.4	86	85.9	85.9	86.7	87.1	86.6	87	87	87	85.4	87	86.2	86.3	86.1	86.2	86.2	86.1	85.9	86.4	86.1	89.2	89.2	89.3	89.8	89.5	89.3	85.4	85.7	91.7	91.4	95.2	94.7		93.7
	C_cordobensis	85.7	85.8	85.4	85.7	86.2	86.6	85.6	86.5	86.6	86.2	86.2	86.2	86.2	86.2	85.9	85.8	85.9	86.5	86.9	86.5	86.8	86.8	86.7	85.3	86.8	86	86.2	86.1	86.1	86.1	86.2	85.9	86.2	85.8	89	89	89.1	89.6	89.3	89.2	85.4	85.6	91.4	91.1	93.6	93.4	93.7
	C_hypogeia'	85.6	85.7	85.4	85.6	86.2	86.5	85.5	86.4	86.6	86.1	86.1	86.2	86.2	86.1	85.8	85.7	85.8	86.4	86.8	86.3	86.7	86.6	86.5	85.1	86.6	86	86.1	86	86.1	86	86.1	85.9	86.2	85.9	88.9	88.9	89	89.4	89.1	89	85.3	85.5	91.2	91	93.3	93	93.5	93.1
	C_calidae'	85.8	85.9	85.6	85.9	86.4	86.7	85.8	86.7	86.9	86.5	86.5	86.4	86.4	86.3	86.1	85.9	86	86.7	87.3	86.6	87	87	87	85.5	87	86.3	86.4	86.2	86.2	86.3	86.4	86.1	86.4	86.1	89.2	89.3	89.4	89.8	89.5	89.5	85.4	85.7	91.8	91.6	94.1	93.8	94.3	93.8
	C_megalochromosomata	85.7	85.8	85.5	85.9	86.3	86.7	85.6	86.6	86.7	86.3	86.3	86.3	86.3	86.3	85.9	85.8	86	86.6	87.1	86.4	86.8	86.8	86.7	85.3	86.8	86	86.2	86.1	86.1	86.1	86	85.8	86.3	85.9	89.3	89.4	89.3	89.7	89.5	89.4	85.4	85.7	91.6	91.3	94.1	94	94.3	93.5
	C_jiangsuensis	85.7	85.7	85.4	85.7	86.3	86.7	85.6	86.6	86.8	86.3	86.3	86.2	86.2	86.2	85.8	85.8	85.9	86.5	87.1	86.5	86.7	86.8	86.7	85.3	86.8	86	86.1	86	86.1	86	86	85.8	86.2	85.9	89.2	89.3	89.4	89.8	89.5	89.5	85.4	85.7	91.6	91.3	94.1	93.9	94.4	93.4
	C_pedi'	85.7	85.8	85.5	85.8	86.3	86.7	85.6	86.6	86.7	86.3	86.3	86.3	86.3	86.3	85.9	85.8	85.9	86.6	87	86.4	86.7	86.8	86.7	85.3	86.9	86	86.1	85.9	86	86	86	85.8	86.3	85.9	89.1	89.2	89.2	89.7	89.7	89.3	85.4	85.7	91.8	91.2	93.7	93.5	93.9	93.4
	C_turbans'	85.2	85.3	85	85.4	85.8	86.2	85.2	86.1	86.3	85.8	85.9	85.8	85.8	85.7	85.4	85.3	85.4	86.1	86.7	86	86.3	86.3	86.3	84.9	86.4	85.7	85.8	85.6	85.7	85.7	85.7	85.4	85.9	85.5	88.7	88.8	88.8	89.2	89.3	88.9	84.9	85.2	91.3	90.7	93.5	93.2	93.7	92.8
	C_peredens'	85.6	85.6	85.4	85.7	86.2	86.5	85.5	86.4	86.6	86.1	86.3	86.1	86.1	86.1	85.8	85.7	85.8	86.4	86.8	86.2	86.6	86.6	86.5	85.4	86.8	86	86.2	86	86.1	86	86	85.8	86.2	85.8	89	89.1	89.2	89.7	89.6	89.5	85.4	85.6	91.7	91.1	92.7	92.5	92.9	92.6
	C_ptereochthonis'	85.1	85.2	84.9	85.2	85.7	86.1	85.1	85.9	86.3	85.9	85.9	85.7	85.6	85.6	85.2	85.2	85.3	86	86.6	85.8	86.2	86.3	86.3	85	86.4	85.7	85.9	85.6	85.6	85.7	85.8	85.4	85.8	85.4	88.5	88.6	88.7	89.2	89.2	89	84.7	84.9	91.1	90.6	92.2	92.1	92.4	92.2
	C_glebae'	85.2	85.3	85	85.3	85.7	86.1	85.1	86.1	86.2	85.8	85.8	85.8	85.7	85.7	85.4	85.3	85.3	86	86.5	85.9	86.2	86.2	86.1	84.9	86.4	85.7	85.7	85.6	85.7	85.7	85.7	85.5	85.8	85.4	88.6	88.7	88.8	89.1	89.2	88.8	85	85.2	91.2	90.5	94.4	93.6	94.4	92.9
	C_arvi'	85.4	85.5	85.2	85.6	86	86.4	85.3	86.2	86.5	86	86	85.9	86	85.9	85.7	85.5	85.6	86.2	86.8	86.2	86.5	86.6	86.5	85.1	86.6	85.8	85.9	85.8	85.8	85.8	85.9	85.6	86	85.6	88.7	88.8	88.9	89.3	89.4	89	85.1	85.3	91.6	90.9	93.5	93.2	93.6	94.8
	C_catudaia'	85.3	85.4	85.1	85.4	85.8	86.2	85.2	86.1	86.3	85.8	85.8	85.8	85.8	85.8	85.5	85.3	85.4	86.1	86.7	86	86.4	86.4	86.3	85	86.5	85.7	85.8	85.6	85.7	85.7	85.8	85.5	85.9	85.5	88.7	88.8	88.8	89.2	89.2	88.9	85	85.2	91.4	90.7	93.2	93	93.4	94.6
Burkholderia	B_plantarii	85.2	85.3	85	85.3	85.9	86.1	85.4	86.2	86.7	86.2	86.3	85.9	85.9	85.7	85.4	85.4	85.8	86.2	86.4	85.9	86.1	86.1	86	85.6	87.6	86.7	86.9	86.4	86.4	86.5	86.5	86.3	86.6	86.4	85.1	85.1	85.4	85.6	85.4	85.8	82.5	82.7	85.1	85.1	85.2	85.1	85.3	85.3
	B_glumae	85	85.1	84.8	85.1	85.6	85.8	85.1	85.9	86.4	85.9	86.1	85.7	85.6	85.5	85.2	85.1	85.5	85.9	86.1	85.6	85.8	85.8	85.7	85.5	87.3	86.6	86.7	86.2	86.1	86.4	86.3	86.1	86.3	86.1	84.8	84.9	85.1	85.2	85.1	85.6	82.4	82.6	84.8	84.8	85	84.9	85.1	85
	B_gladioli	84.8	84.8	84.6	84.9	85.5	85.6	85	85.8	86.2	85.7	85.8	85.6	85.6	85.4	85.2	85.2	85.6	85.7	85.8	85.3	85.6	85.5	85.5	85.1	86.8	86.5	86.6	86.1	86.1	86.2	86.3	86.1	86.2	86.2	84.6	84.6	84.9	85	84.9	85.4	82.2	82.5	84.6	84.6	84.7	84.6	84.8	84.7
	B_mallei	85.6	85.7	85.5	85.8	86.3	86.6	85.6	86.5	87.2	86.7	86.7	86.2	86.1	85.9	85.7	85.7	85.9	86.9	87.5	86.7	86.9	86.9	86.8	86.3	88.5	87.1	87.2	86.8	86.7	86.9	86.9	86.6	86.8	86.4	86	86.1	86.1	86.5	86.3	86.7	83	83.1	86	85.9	86.1	86.1	86.2	86.1
	B_pseudomallei	85.6	85.7	85.5	85.8	86.3	86.6	85.6	86.5	87.2	86.7	86.8	86.2	86.1	85.9	85.7	85.7	85.9	87	87.5	86.7	86.9	86.9	86.8	86.3	88.5	87.1	87.2	86.8	86.7	86.9	86.9	86.6	86.8	86.5	86	86.1	86.2	86.6	86.3	86.7	83	83.2	86	85.9	86.1	86.1	86.2	86.1
	B_thailandensis	85.7	85.7	85.5	85.8	86.3	86.6	85.6	86.6	87.2	86.7	86.8	86.2	86.1	85.9	85.7	85.7	86	87	87.5	86.7	87	87	86.9	86.3	88.4	87	87.1	86.8	86.7	86.9	86.8	86.5	86.8	86.4	85.9	86	86.2	86.5	86.2	86.7	83	83.2	86	85.9	86	86.1	86.2	86
	B_oklahomensis	85.8	85.9	85.6	85.9	86.4	86.7	85.8	86.8	87.3	86.9	86.9	86.4	86.3	86.1	86	85.8	86.2	87.1	87.6	86.8	87.1	87.2	87.1	86.3	88.6	87.1	87.1	86.9	86.9	87	86.9	86.6	86.8	86.5	86.1	86.2	86.3	86.6	86.4	86.8	83.1	83.3	86.1	86.1	86.2	86.2	86.4	86.2
	B_stagnalis	86.1	86.2	85.8	86.2	86.7	86.9	86.1	87.1	87.7	87.2	87.3	86.8	86.8	86.5	86.3	86.2	86.6	87.3	87.8	87.1	87.3	87.3	87.3	86.3	88.7	87.3	87.4	87.1	87.2	87.2	87.2	86.9	87.2	87	86.1	86.2	86.3	86.6	86.4	86.9	83.2	83.4	86.1	86.1	86.2	86.2	86.4	86.2
	B_ubonensis	85.9	86	85.7	86.1	86.5	86.8	85.9	87	87.6	87.1	87.2	86.6	86.7	86.4	86.2	86.1	86.5	87.3	87.7	87.1	87.2	87.2	87.2	86.3	88.7	87.1	87.3	87	87	87.1	87	86.7	87	86.8	86	86.1	86.3	86.5	86.3	86.8	83	83.3	86	86	86.2	86.1	86.4	86.2
	B_dolosa	85.9	86	85.7	86.1	86.5	86.8	85.9	86.8	87.5	87.1	87.1	86.4	86.4	86.3	86.2	86	86.1	87.1	87.5	86.9	87.1	87.2	87.1	86.3	88.6	87	87.1	86.8	86.8	86.9	86.8	86.5	86.9	86.7	86	86.2	86.3	86.6	86.4	86.7	83.2	83.3	86	86	86.2	86.2	86.3	86.2
	B_multivorans	86	86	85.7	86.1	86.5	86.8	85.9	86.9	87.5	87.1	87.1	86.6	86.5	86.4	86.2	86	86.3	87.1	87.7	87	87.3	87.3	87.3	86.3	88.5	87	87.1	86.9	86.9	87	87	86.6	87	86.7	86.1	86.1	86.2	86.6	86.4	86.6	83.1	83.3	86.2	86.1	86.2	86.2	86.4	86.2
	B_pseudomultivorans	86.1	86.2	85.9	86.2	86.7	86.9	86.2	87.1	87.8	87.3	87.3	86.8	86.8	86.5	86.4	86.3	86.6	87.3	87.7	87.1	87.4	87.3	87.3	86.4	88.7	87.4	87.4	87.1	87.2	87.2	87.2	86.9	87.2	87	86.1	86.2	86.3	86.6	86.4	86.8	83.3	83.4	86	86	86.3	86.2	86.4	86.3
	B_territorii	86.1	86.1	85.8	86.1	86.5	86.8	86	86.9	87.5	87	87	86.6	86.6	86.4	86.3	86.1	86.4	87.1	87.6	86.9	87.2	87.2	87.2	86.1	88.2	86.9	87	86.8	86.8	86.9	86.8	86.6	86.8	86.7	85.8	86	86.1	86.4	86.2	86.5	83.1	83.3	85.8	85.8	86	85.9	86.2	86
	B_diffusa	85.9	86	85.6	86.1	86.4	86.7	85.9	86.8	87.4	86.9	86.9	86.5	86.5	86.3	86.2	86.1	86.3	87.1	87.4	86.8	87.1	87.1	87	86	88.1	86.8	86.9	86.7	86.8	86.8	86.6	86.4	86.8	86.6	85.8	85.9	86	86.3	86.1	86.4	83	83.3	85.8	85.8	86	85.9	86.1	85.9
	B_latens	85.7	85.8	85.5	85.8	86.3	86.5	85.7	86.7	87.2	86.7	86.8	86.3	86.3	86.1	86	85.9	86.1	86.9	87.3	86.7	87	87	86.9	85.9	88	86.7	86.6	86.6	86.5	86.6	86.5	86.2	86.5	86.4	85.7	85.8	85.8	86.2	85.9	86.3	82.9	83.1	85.7	85.6	85.8	85.8	85.9	85.8
	B_vietnamiensis	86.1	86.1	85.8	86.1	86.6	86.8	86	87	87.6	87.1	87.2	86.6	86.6	86.4	86.3	86.1	86.4	87.2	87.5	86.9	87.2	87.2	87.1	86.3	88.4	87	87.1	87	87	87	87	86.8	86.9	86.8	86.1	86.2	86.2	86.5	86.4	86.6	83.1	83.4	86	86	86.1	86	86.3	86.1
	B_ambifaria	86	86	85.7	86	86.4	86.7	85.8	86.8	87.4	87	87	86.6	86.5	86.3	86.2	86	86.3	87.1	87.5	86.8	87.2	87.2	87.1	86	88.2	86.9	86.9	86.8	86.8	86.8	86.8	86.5	86.8	86.7	85.8	85.9	86.1	86.3	86.2	86.5	83	83.3	85.8	85.7	85.9	85.9	86.1	85.9
	B_pyrrocinia	85.9	86	85.7	86	86.5	86.7	85.9	86.9	87.4	87	87	86.6	86.6	86.4	86.3	86.1	86.4	87.2	87.5	86.9	87.3	87.2	87.2	86.1	88.3	86.9	87	86.8	86.9	86.9	86.8	86.6	86.9	86.7	85.9	85.9	86	86.3	86.2	86.5	83	83.3	85.7	85.7	85.9	85.9	86.1	85.9
	B_stabilis	85	85.1	84.9	85.1	85.6	85.8	85	86	86.5	86.1	86.1	85.7	85.7	85.5	85.4	85.2	85.5	86.3	86.6	86	86.4	86.3	86.4	85.4	87.4	86.1	86.1	86	86	86	86	85.7	86.1	85.9	85	85.1	85.2	85.4	85.4	85.6	82.2	82.5	84.8	84.8	85	85	85.2	85
	B_cenocepacia	86	86	85.7	86.1	86.6	86.8	86	87	87.5	87.2	87.1	86.6	86.6	86.4	86.3	86.1	86.5	87.3	87.5	86.9	87.3	87.2	87.2	86.3	88.4	87.1	87.1	86.9	87	87	87	86.8	87.1	86.9	86	86.1	86.2	86.5	86.3	86.6	83.1	83.4	85.9	85.9	86.1	86.1	86.2	86.1
	B_anthina	86.1	86.1	85.8	86.1	86.6	86.9	86.1	87.1	87.6	87.2	87.2	86.7	86.7	86.5	86.3	86.2	86.5	87.3	87.7	87	87.4	87.3	87.3	86.4	88.5	87.2	87.2	87	87.1	87.1	87.1	86.8	87.1	86.9	86.1	86.2	86.4	86.6	86.4	86.8	83.2	83.4	86	86	86.2	86.2	86.3	86.2
	B_seminalis	86	86.1	85.8	86.1	86.6	86.8	86	87	87.5	87.1	87.1	86.7	86.7	86.5	86.3	86.1	86.5	87.2	87.5	86.9	87.3	87.3	87.2	86.3	88.4	87	87.1	86.9	87	87	86.9	86.7	87.1	86.8	86	86.1	86.2	86.4	86.3	86.7	83.1	83.3	85.8	85.8	86	86	86.2	86.1
	B_cepacia	86	86	85.7	86	86.4	86.8	85.9	87	87.4	87	87	86.6	86.6	86.4	86.2	86.1	86.5	87.1	87.5	86.9	87.2	87.2	87.2	86.1	88.2	86.9	87	86.8	86.8	86.8	86.8	86.6	86.9	86.8	85.8	85.9	86	86.3	86.2	86.4	83.1	83.3	85.7	85.7	85.9	85.9	86.1	85.9
	B_contaminans	85.8	85.9	85.6	85.8	86.3	86.6	85.8	86.7	87.3	86.8	86.9	86.5	86.4	86.3	86.1	86	86.3	87	87.3	86.8	87	87	87	85.9	88	86.8	86.8	86.6	86.7	86.7	86.6	86.5	86.8	86.7	85.7	85.7	85.9	86.1	85.9	86.2	82.9	83.2	85.4	85.5	85.7	85.7	85.9	85.7
	B_lata	85.9	86	85.7	85.9	86.3	86.7	85.9	86.9	87.3	86.9	86.9	86.6	86.5	86.3	86.2	86.1	86.4	87	87.3	86.8	87.1	87.1	87	85.9	88.1	86.7	86.9	86.7	86.8	86.7	86.7	86.5	86.8	86.7	85.7	85.8	85.9	86.1	86	86.2	83	83.2	85.6	85.6	85.8	85.8	86	85.8
	P_rhizoxinica	80.9	80.9	80.6	81	81.2	81.3	80.7	81.4	81.7	81.4	81.6	81.2	81.2	81.1	81	81	81.3	81.6	81.8	81.3	81.6	81.5	81.4	81.1	82.6	81.5	81.6	81.3	81.2	81.5	81.5	81.2	81.4	81.1	81	81	81.2	81.3	81.2	81.6	79.3	79.5	81	81	81	81	81.2	81.1
	Ro_andropogonis	76.4	76.4	76.1	76.4	76.6	76.7	76.1	77	77.1	76.6	76.9	76.7	76.8	76.6	76.6	76.6	76.7	76.9	76.9	76.6	76.9	76.8	76.7	75.9	77.3	76.7	76.7	76.6	76.5	76.7	76.7	76.5	76.7	76.8	76.4	76.4	76.5	76.5	76.4	76.6	75.4	75.6	76.4	76.5	76.5	76.4	76.5	76.4
	Cu_nantongensis	78.1	78.2	77.8	78.1	78.7	78.7	78.1	78.8	79.2	78.8	78.9	78.7	78.7	78.6	78.3	78.2	78.8	78.8	78.9	78.7	78.9	78.8	78.7	78.6	79.8	79.5	79.7	79.2	79.2	79.4	79.5	79.4	79.2	79.3	78.3	78.3	78.6	78.8	78.6	79.1	76.7	76.9	78.4	78.5	78.4	78.4	78.7	78.6
	Cu_necator	77.2	77.3	77	77.1	77.8	77.7	77.1	77.8	78.1	77.7	77.8	77.8	77.8	77.7	77.4	77.3	77.9	77.7	77.9	77.7	77.9	77.8	77.7	77.6	78.7	78.5	78.7	78.3	78.3	78.3	78.5	78.3	78.2	78.3	77.3	77.3	77.6	77.7	77.6	78	75.8	76	77.4	77.4	77.3	77.3	77.5	77.6
	Cu_metallidurans	77.5	77.5	77.2	77.5	77.9	78	77.4	78.3	78.4	78	78.1	78.2	78.1	78	77.8	77.8	78	78.1	78.3	77.9	78.2	78.2	78.1	77.6	78.8	78.6	78.8	78.4	78.5	78.5	78.7	78.5	78.5	78.7	77.5	77.5	77.8	77.9	77.7	78.1	76.2	76.3	77.7	77.7	77.7	77.6	77.9	77.7
	Ra_solanacearum	77.9	78	77.7	77.8	78.4	78.5	77.9	78.6	78.9	78.4	78.6	78.4	78.5	78.2	78.1	78	78.4	78.6	78.7	78.4	78.6	78.5	78.5	78.5	79.5	79.1	79.4	79	79	79.1	79.2	79	78.9	78.9	78	78.1	78.3	78.4	78.3	78.6	76.5	76.6	78.2	78.2	78	78	78.2	78.3
	Ra_pickettii	77.5	77.5	77.3	77.5	77.8	77.9	77.3	78	78.1	77.8	78	77.9	77.9	77.8	77.7	77.6	77.9	77.9	78.2	77.8	78.1	78.1	78	77.7	78.5	78.4	78.5	78.2	78.3	78.3	78.4	78.2	78.3	78.3	77.4	77.4	77.6	77.8	77.6	77.8	76	76.2	77.6	77.7	77.5	77.5	77.7	77.7
	Ra_mannitolytica	77.9	78	77.7	78	78.4	78.4	77.9	78.4	78.7	78.3	78.5	78.4	78.4	78.3	78.1	78	78.4	78.5	78.8	78.4	78.7	78.6	78.5	78.4	79.3	79	79.3	79	79	79	79.1	79	78.9	78.9	78.1	78.1	78.3	78.4	78.3	78.6	76.5	76.8	78.2	78.3	78.2	78.2	78.4	78.4
[truncated: 44 more columns]
